# Supplementary material for: Fluorometric In Situ Monitoring of an Escherichia coli Cell Factory with Cytosolic Expression of Human Glycosyltransferase GalNAcT2: Prospects and Limitations
Source: MDPI journal article supplement (doi:10.3390/bioengineering3040032), 2016-11-21
Supplement: s1 [file s1]

# Supplementary Materials: Fluorometric In Situ Monitoring of an *Escherichia coli* Cell Factory with Cytosolic Expression of Human Glycosyltransferase GalNAcT2: Prospects and Limitations

Karen Schwab <sup>\*,†</sup>, Jennifer Lauber <sup>†</sup> and Friedemann Hesse

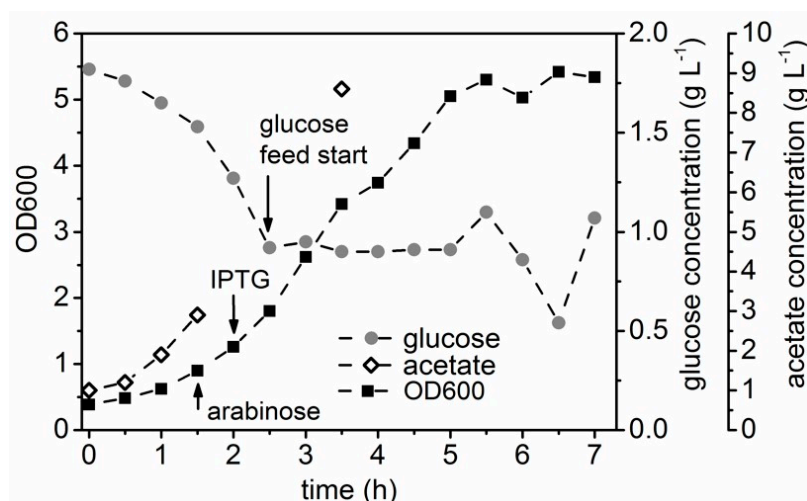

**Figure S1.** *E. coli* Shuffle® T7 cell factory LB-medium fed-batch process. OD<sub>600</sub>, as well as glucose and acetate, concentrations were measured offline. The glucose target concentration for the feed was 1 g L<sup>-1</sup>. The cell factory was induced following the same protocol as described for the EnPresso® B medium. Only negligible amounts of glycosyltransferase were formed and the fermentation was stopped after increased inclusion body accumulation was observed and the *E. coli* cell morphology changed.

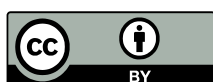

© 2016 by the authors. Submitted for possible open access publication under the terms and conditions of the Creative Commons Attribution (CC-BY) license (<http://creativecommons.org/licenses/by/4.0/>).
